# Supplementary material for: Feedforward Inhibition and Synaptic Scaling – Two Sides of the Same Coin?
Source: PLOS journal article supplement (doi:10.1371/journal.pcbi.1002432), 2012-03-22
Supplement: S1 (10.1371/journal.pcbi.1002432.s001) [file journal.pcbi.1002432.s001]

# Feedforward inhibition and synaptic scaling – two sides of the same coin?

Christian Keck<sup>1,†</sup>, Cristina Savin<sup>2,†</sup>, Jörg Lücke<sup>1,3,\*</sup>

<sup>1</sup>Frankfurt Institute for Advanced Studies, Frankfurt am Main, Germany

<sup>2</sup>Computational and Biological Learning Lab, Department of Engineering, University of Cambridge, Cambridge, UK

<sup>3</sup>Department of Physics, Goethe-University, Frankfurt am Main, Germany

† These authors contributed equally to this work.

\*E-mail: luecke@fias.uni-frankfurt.de

## Text S1

The main intermediate steps of the derivation of the fixed point (main text, Eq. 5) were given in the Methods. Here, we discuss the details of the derivation.

**Derivation of Equation 14 .** First, we show that we obtain Eq. 14 (see Methods) if we apply Eq. 13 iteratively  $N$  times. For the derivation of Eq. 14, we will use two identities. First, note that for any sequence  $R^{(n)}$  and  $S^{(n)}$  the following holds:

$$\sum_{n=1}^N R^{(N-n)} \prod_{n'=n+1}^N (1 + S^{(N-n')}) + R^{(N)} \prod_{n'=1}^N (1 + S^{(N-n')}) = \sum_{n=1}^{N+1} R^{(N+1-n)} \prod_{n'=n+1}^{N+1} (1 + S^{(N+1-n')}). \quad (1)$$

Second, note that for any sequence  $S^{(n)}$  we have:

$$1 + \sum_{n=1}^N S^{(N-n)} \prod_{n'=n+1}^N (1 + S^{(N-n')}) = \prod_{n=1}^N (1 + S^{(N-n)}), \quad (2)$$

Eq. 1 is given in a straight-forward way by splitting the right-hand-side into a sum to  $N$  plus an additional term, and by changing the indices. Eq. 2 can be proven by induction and by making use of Eq. 1 for  $R^{(n)} = S^{(n)}$ . For both identities and in the following, we use the convention that for  $n = N$  the product  $\prod_{n'=n+1}^N X_{n'}$  is equal to one.

We will now show by induction that Eq. 14 holds. For  $N = 1$  Eq. 14 is equal to Eq. 13 which verifies the base case. For the induction step, we start with Eq. 13 for  $N + 1$  and insert Eq. 14 for  $W_{cd}^{(T+N)}$ , which

results in:

$$\begin{aligned}
W_{cd}^{(T+N+1)} &= A \frac{W_{cd}^{(T)} + \epsilon \sum_{n=1}^N F_{cd}^{(T+N-n)} \prod_{n'=n+1}^N (1 + \frac{\epsilon}{A} \sum_{d''} F_{cd''}^{(T+N-n')}) + \epsilon F_{cd}^{(T+N)} \prod_{n'=1}^N (1 + \frac{\epsilon}{A} \sum_{d''} F_{cd''}^{(T+N-n')})}{\sum_{d'} (W_{cd'}^{(T)} + \epsilon \sum_{n=1}^N F_{cd'}^{(T+N-n)} \prod_{n'=n+1}^N (1 + \frac{\epsilon}{A} \sum_{d''} F_{cd''}^{(T+N-n')}) + \epsilon F_{cd'}^{(T+N)} \prod_{n'=1}^N (1 + \frac{\epsilon}{A} \sum_{d''} F_{cd''}^{(T+N-n')}))} \\
&= \frac{W_{cd}^{(T)} + \epsilon \sum_{n=1}^{N+1} F_{cd}^{(T+N+1-n)} \prod_{n'=n+1}^{N+1} (1 + \frac{\epsilon}{A} \sum_{d''} F_{cd''}^{(T+N+1-n')})}{1 + \sum_{n=1}^{N+1} (\frac{\epsilon}{A} \sum_{d'} F_{cd'}^{(T+N+1-n)} \prod_{n'=n+1}^{N+1} (1 + \frac{\epsilon}{A} \sum_{d''} F_{cd''}^{(T+N+1-n')}))} \\
&= \frac{W_{cd}^{(T)} + \epsilon \sum_{n=1}^{N+1} F_{cd}^{(T+N+1-n)} \prod_{n'=n+1}^{N+1} (1 + \frac{\epsilon}{A} \sum_{d''} F_{cd''}^{(T+N+1-n')})}{\prod_{n'=1}^{N+1} (1 + \frac{\epsilon}{A} \sum_{d'} F_{cd'}^{(T+N+1-n')})}.
\end{aligned} \tag{3}$$

$$\tag{4}$$

To obtain (3) we applied identity (1) with  $R^{(n')} = F_{cd}^{(T+n')}$  and  $S^{(n')} = \frac{\epsilon}{A} \sum_{d'} F_{cd'}^{(T+n')}$ . To obtain (4) we applied identity (2) with  $S^{(n')} = \frac{\epsilon}{A} \sum_{d'} F_{cd'}^{(T+n')}$ . The final expression (4) is identical to Eq. 14 for  $N + 1$ , which completes the induction step and proves the claim.

**Approximation 1.** First, consider the product in the numerator of (14). If we rewrite the expression using  $x = \exp(\log(x))$ , we can apply a Taylor expansion for  $\log(1+x)$  around  $x=0$ . By keeping the linear term for small  $\epsilon$  we obtain:

$$\begin{aligned}
\prod_{n'=n+1}^N (1 + \frac{\epsilon}{A} \sum_{d'} F_{cd'}^{(T+N-n')}) &= \exp\left(\sum_{n'=n+1}^N \log(1 + \frac{\epsilon}{A} \sum_{d'} F_{cd'}^{(T+N-n')})\right) \\
&\approx \exp\left(\frac{\epsilon}{A} \sum_{d'} \sum_{n'=n+1}^N F_{cd'}^{(T+N-n')}\right) \approx \exp\left(\frac{\epsilon}{A} (N-n) \sum_{d'} \hat{F}_{cd'}^{(n)}\right),
\end{aligned} \tag{5}$$

By applying the approximation (5) to the numerator of (14) and for  $n=0$  to the denominator, we obtain (15).

### Approximation 2.

Consider the sum over  $n$  in (15). For the summands with relatively small  $n$ ,  $\sum_{d'} \hat{F}_{cd'}^{(n)}$  is well approximated by the mean over  $N$  iterations,  $\sum_d \hat{F}_{cd}^{(n)} \approx \sum_d \frac{1}{N} \sum_{n=1}^N F_{cd}^{(T+n)} = \hat{F}_c^{(0)}$ . Only for  $n$  close to  $N$  we can expect the approximation to become inaccurate. Note, however, that the sum in (15) is dominated by summands with small values of  $n$ . This is because for small  $\epsilon$  and large  $N$  the exponential factors are very large for  $n$  significantly smaller than  $N$  compared to factors with  $n$  close to  $N$ . We can therefore approximate:

$$\sum_{n=1}^N \exp\left(\frac{\epsilon}{A} (N-n) \sum_{d'} \hat{F}_{cd'}^{(n)}\right) F_{cd}^{(T+N-n)} \approx \exp\left(\frac{\epsilon}{A} N \sum_{d'} \hat{F}_{cd'}^{(0)}\right) \sum_{n=1}^N \exp\left(-\frac{\epsilon}{A} n \sum_{d'} \hat{F}_{cd'}^{(0)}\right) F_{cd}^{(T+N-n)} \tag{6}$$

The sum on the right-hand-side of (6) we now split into  $K$  parts with  $\tilde{N}$  summands such that  $\exp\left(-\frac{\epsilon}{A} n \sum_{d'} \hat{F}_{cd'}^{(0)}\right)$  changes little across each partial sum (note that we assume constant  $W$ ). We

can then approximate:

$$\begin{aligned}
\sum_{n=1}^N \exp\left(-\frac{\epsilon}{A} n \sum_{d'} \hat{F}_{cd'}^{(0)}\right) F_{cd}^{(T+N-n)} &= \sum_{k=0}^{K-1} \sum_{n=k\tilde{N}}^{(k+1)\tilde{N}} \exp\left(-\frac{\epsilon}{A} n \sum_{d'} \hat{F}_{cd'}^{(0)}\right) F_{cd}^{(T+N-n)} \\
\approx \sum_{k=0}^{K-1} \sum_{n=k\tilde{N}}^{(k+1)\tilde{N}} \exp\left(-\frac{\epsilon}{A} n \sum_{d'} \hat{F}_{cd'}^{(0)}\right) \hat{F}_{cd}^{(0)} &= \hat{F}_{cd}^{(0)} \sum_{n=1}^N \exp\left(-\frac{\epsilon}{A} n \sum_{d'} \hat{F}_{cd'}^{(0)}\right)
\end{aligned} \tag{7}$$

If we apply (6) and (7) to Eq. 15 , we obtain Eq. 16 .

### Approximation 3.

To obtain the left-hand-side of (17 ), we first observe that the sum over  $n$  in (16 ) can be written as a geometric series:

$$\sum_{n=1}^N q^n = \frac{q - q^{N+1}}{1 - q} \approx \frac{q}{1 - q} \text{ with } q = \exp\left(-\frac{\epsilon}{A} \sum_{d'} \hat{F}_{cd'}^{(0)}\right). \tag{8}$$

The approximation holds for small but finite  $\epsilon$  and large  $N$ :  $q$  is smaller than one for small  $\epsilon$ , which implies that  $q^{N+1}$  approaches zero for large  $N$ . By applying (8) to (16 ) and by observing that the first term in (16 ) is negligible for large  $N$ , we obtain (17 ).
